# Supplementary material for: Multifunctional ZnII–LnIII(Ln = Tb, Dy) complexes based on the amine-phenol ligand with field-induced slow magnetic relaxation, luminescence, and proton conduction
Source: Royal Society of Chemistry journal article supplement (doi:10.1039/d0nj04926c), 2020-12-17
Supplement: d0nj04926c1.pdf [file d0nj04926c1.pdf]

## *Electronic Supplementary Information (ESI)*

### **Multifunctional Zn<sup>II</sup>-Ln<sup>III</sup> (Ln = Tb, Dy) complexes based on the amine-phenol ligand with field-induced slow magnetic relaxation, luminescence and proton conduction**

Xiao-Nuan Zhang, Jun-Jie Hu, Jia-Li Zhang, Sui-Jun Liu,\* Jin-Sheng Liao and He-Rui Wen\*

*School of Chemistry and Chemical Engineering, Jiangxi University of Science and Technology, Ganzhou 341000, Jiangxi Province, P.R. China*

*E-mail: wenherui63@163.com (H.-R. Wen), sjliu@jxust.edu.cn (S.-J. Liu)*

**Table S1.** Selected bond lengths (Å) and angles (deg) for **1**.

|             |            |            |            |
|-------------|------------|------------|------------|
| Dy1—O9      | 2.285(3)   | Dy1—O6     | 2.356(5)   |
| Dy1—O4      | 2.296(4)   | Dy1—O8     | 2.368(4)   |
| Dy1—O10     | 2.337(4)   | Dy1—O7     | 2.539(4)   |
| Dy1—O5      | 2.334(4)   | Dy1—O3     | 2.540(4)   |
| Zn1—O10     | 2.059(4)   | O4—Zn2     | 2.092(4)   |
| Zn1—O9      | 2.072(4)   | O5—Zn2     | 2.037(4)   |
| Zn1—N1      | 2.101(6)   | Zn2—N3     | 2.094(5)   |
| Zn1—N2      | 2.131(5)   | Zn2—N4     | 2.128(5)   |
| Zn1—O12     | 2.202(5)   | O2—Zn2     | 2.307(4)   |
| Zn1—O13     | 2.306(6)   | O1—Zn2     | 2.230(5)   |
| O9—Dy1—O4   | 105.33(15) | O6—Dy1—O8  | 81.61(19)  |
| O9—Dy1—O10  | 67.02(14)  | O9—Dy1—O7  | 64.89(14)  |
| O4—Dy1—O10  | 87.80(14)  | O4—Dy1—O7  | 143.44(14) |
| O9—Dy1—O5   | 87.60(14)  | O10—Dy1—O7 | 116.27(13) |
| O4—Dy1—O5   | 66.69(13)  | O5—Dy1—O7  | 77.47(13)  |
| O10—Dy1—O5  | 138.16(14) | O6—Dy1—O7  | 77.84(16)  |
| O9—Dy1—O6   | 140.99(16) | O8—Dy1—O7  | 75.52(15)  |
| O4—Dy1—O6   | 97.59(18)  | O9—Dy1—O3  | 142.51(14) |
| O10—Dy1—O6  | 146.13(17) | O4—Dy1—O3  | 64.92(13)  |
| O5—Dy1—O6   | 72.91(18)  | O10—Dy1—O3 | 76.25(14)  |
| O9—Dy1—O8   | 99.04(16)  | O5—Dy1—O3  | 116.92(13) |
| O4—Dy1—O8   | 140.35(14) | O6—Dy1—O3  | 75.97(17)  |
| O10—Dy1—O8  | 73.44(15)  | O8—Dy1—O3  | 76.65(14)  |
| O5—Dy1—O8   | 146.07(15) | O7—Dy1—O3  | 144.04(14) |
| O10—Zn1—O9  | 76.27(15)  | O5—Zn2—O4  | 76.08(15)  |
| O10—Zn1—N1  | 164.0(2)   | O5—Zn2—N3  | 162.12(18) |
| O9—Zn1—N1   | 90.2(2)    | O4—Zn2—N3  | 89.36(19)  |
| O10—Zn1—N2  | 90.48(19)  | O5—Zn2—N4  | 91.60(19)  |
| O9—Zn1—N2   | 113.8(2)   | O4—Zn2—N4  | 113.5(2)   |
| N1—Zn1—N2   | 102.8(2)   | N3—Zn2—N4  | 103.9(2)   |
| O10—Zn1—O12 | 96.23(19)  | O5—Zn2—O1  | 95.82(17)  |
| O9—Zn1—O12  | 168.1(2)   | O4—Zn2—O1  | 168.37(18) |
| N1—Zn1—O12  | 95.7(2)    | N3—Zn2—O1  | 96.9(2)    |
| N2—Zn1—O12  | 75.0(2)    | N4—Zn2—O1  | 74.6(2)    |
| O10—Zn1—O13 | 97.32(19)  | O5—Zn2—O2  | 96.20(16)  |
| O9—Zn1—O13  | 103.59(19) | O4—Zn2—O2  | 104.01(16) |
| N1—Zn1—O13  | 77.5(3)    | N3—Zn2—O2  | 77.07(19)  |
| N2—Zn1—O13  | 142.6(2)   | N4—Zn2—O2  | 142.46(19) |
| Zn1—O10—Dy1 | 107.38(16) | Zn2—O4—Dy1 | 108.14(16) |
| Zn1—O9—Dy1  | 108.94(16) | Zn2—O5—Dy1 | 108.67(16) |

**Table S2.** Selected bond lengths (Å) and angles (deg) for **2**.

|             |            |             |            |
|-------------|------------|-------------|------------|
| Tb1—O8      | 2.294(5)   | Zn2—O20     | 2.039(5)   |
| Tb1—O1      | 2.313(5)   | Zn2—O1      | 2.088(5)   |
| Tb1—O20     | 2.343(5)   | Zn2—N4      | 2.098(6)   |
| Tb1—O2      | 2.347(5)   | Zn2—N1      | 2.133(6)   |
| Tb1—O29     | 2.377(5)   | Zn2—O4      | 2.216(5)   |
| Tb1—O30     | 2.378(5)   | Zn2—O5      | 2.302(5)   |
| Tb1—O9      | 2.547(5)   | Zn3—O2      | 2.057(5)   |
| Tb1—O7      | 2.554(5)   | Zn3—O8      | 2.070(5)   |
| Tb1—Zn3     | 3.5560(10) | Zn3—N2      | 2.095(7)   |
| Tb1—Zn2     | 3.5625(9)  | Zn3—N3      | 2.129(6)   |
| Zn3—O13     | 2.297(6)   | Zn3—O12     | 2.202(6)   |
| O8—Tb1—O1   | 105.37(17) | O30—Tb1—O9  | 75.66(18)  |
| O8—Tb1—O20  | 87.84(17)  | O8—Tb1—O7   | 142.26(16) |
| O1—Tb1—O20  | 66.60(16)  | O1—Tb1—O7   | 64.58(16)  |
| O8—Tb1—O2   | 66.63(16)  | O20—Tb1—O7  | 116.63(16) |
| O1—Tb1—O2   | 87.75(16)  | O2—Tb1—O7   | 76.41(17)  |
| O20—Tb1—O2  | 137.91(16) | O29—Tb1—O7  | 75.84(17)  |
| O8—Tb1—O29  | 141.32(17) | O30—Tb1—O7  | 77.16(17)  |
| O1—Tb1—O29  | 97.88(18)  | O9—Tb1—O7   | 144.81(17) |
| O20—Tb1—O29 | 73.46(18)  | O8—Tb1—Zn3  | 33.38(12)  |
| O2—Tb1—O29  | 145.87(18) | O1—Tb1—Zn3  | 94.99(12)  |
| O8—Tb1—O30  | 98.68(18)  | O20—Tb1—Zn3 | 113.07(12) |
| O1—Tb1—O30  | 140.49(17) | O2—Tb1—Zn3  | 33.47(12)  |
| O20—Tb1—O30 | 146.17(18) | O29—Tb1—Zn3 | 167.08(13) |
| O2—Tb1—O30  | 73.52(18)  | O30—Tb1—Zn3 | 88.12(14)  |
| O29—Tb1—O30 | 81.25(19)  | O9—Tb1—Zn3  | 92.00(11)  |
| O8—Tb1—O9   | 64.52(16)  | O7—Tb1—Zn3  | 109.04(12) |
| O1—Tb1—O9   | 143.25(16) | O8—Tb1—Zn2  | 95.38(13)  |
| O20—Tb1—O9  | 77.47(16)  | O1—Tb1—Zn2  | 33.88(11)  |
| O2—Tb1—O9   | 115.97(16) | O20—Tb1—Zn2 | 32.87(12)  |
| O29—Tb1—O9  | 78.31(17)  | O2—Tb1—Zn2  | 113.76(11) |
| O29—Tb1—Zn2 | 86.95(13)  | O1—Zn2—O5   | 104.32(19) |

---

|             |            |             |            |
|-------------|------------|-------------|------------|
| O30—Tb1—Zn2 | 165.87(14) | N4—Zn2—O5   | 77.2(2)    |
| O9—Tb1—Zn2  | 109.60(12) | N1—Zn2—O5   | 142.6(2)   |
| O7—Tb1—Zn2  | 92.49(11)  | O4—Zn2—O5   | 68.1(2)    |
| Zn3—Tb1—Zn2 | 104.51(2)  | O20—Zn2—Tb1 | 38.58(13)  |
| O20—Zn2—O1  | 76.54(18)  | O1—Zn2—Tb1  | 38.14(13)  |
| O20—Zn2—N4  | 162.7(2)   | N4—Zn2—Tb1  | 127.34(19) |
| O1—Zn2—N4   | 89.4(2)    | N1—Zn2—Tb1  | 102.48(18) |
| O20—Zn2—N1  | 91.1(2)    | O4—Zn2—Tb1  | 134.09(17) |
| O1—Zn2—N1   | 113.0(2)   | O5—Zn2—Tb1  | 105.96(14) |
| N4—Zn2—N1   | 103.9(3)   | O2—Zn3—O8   | 76.31(18)  |
| O20—Zn2—O4  | 95.6(2)    | O2—Zn3—N2   | 163.8(2)   |
| O1—Zn2—O4   | 168.7(2)   | O8—Zn3—N2   | 90.1(2)    |
| N4—Zn2—O4   | 96.7(2)    | O2—Zn3—N3   | 90.5(2)    |
| N1—Zn2—O4   | 74.7(2)    | O8—Zn3—N3   | 114.1(2)   |
| O20—Zn2—O5  | 96.21(19)  | N2—Zn3—N3   | 103.2(3)   |
| O2—Zn3—O12  | 96.0(2)    | Zn3—O2—Tb1  | 107.5(2)   |
| O8—Zn3—O12  | 167.9(2)   | Zn2—O1—Tb1  | 107.98(19) |
| N2—Zn3—O12  | 95.9(3)    | Zn3—O8—Tb1  | 109.0(2)   |
| N3—Zn3—O12  | 74.9(3)    | Zn2—O20—Tb1 | 108.5(2)   |
| O2—Zn3—O13  | 96.9(2)    | O2—Zn3—Tb1  | 39.00(13)  |
| O8—Zn3—O13  | 103.1(2)   | O8—Zn3—Tb1  | 37.58(13)  |
| N2—Zn3—O13  | 77.4(3)    | N2—Zn3—Tb1  | 127.6(2)   |
| N3—Zn3—O13  | 142.8(3)   | N3—Zn3—Tb1  | 102.33(18) |
| O12—Zn3—O13 | 68.1(2)    | O12—Zn3—Tb1 | 134.85(19) |
| O13—Zn3—Tb1 | 106.25(16) |             |            |

---

**Table S3.** The Zn<sup>II</sup>/Dy<sup>III</sup>/Tb<sup>III</sup> ions of geometric analysis in complexes **1** and **2**.

| Complex      | Metal Ions                                 | Label       | Shape                         | Symmetry                   | Distortion( $\tau$ ) |
|--------------|--------------------------------------------|-------------|-------------------------------|----------------------------|----------------------|
| <b>1</b>     | Zn <sup>II</sup>                           | HP-6        | Hexagon                       | $D_{6h}$                   | 30.601               |
|              |                                            | PPY-6       | Pentagonal pyramid            | $C_{5v}$                   | 20.009               |
|              |                                            | <b>OC-6</b> | <b>Octahedron</b>             | <b><math>O_h</math></b>    | <b>4.256</b>         |
|              |                                            | TPR-6       | Trigonal prism                | $D_{3h}$                   | 11.066               |
|              |                                            | JPPY-6      | Johnson pentagonal pyramid J2 | $C_{5v}$                   | 24.080               |
|              |                                            | <b>1</b>    | Dy <sup>III</sup>             | OP-8                       | Octagon              |
| HPY-8        | Heptagonal pyramid                         |             |                               | $C_{7v}$                   | 23.166               |
| HBPY-8       | Hexagonal bipyramid                        |             |                               | $D_{6h}$                   | 15.530               |
| CU-8         | Cube                                       |             |                               | $O_h$                      | 10.076               |
| SAPR-8       | Square antiprism                           |             |                               | $D_{4d}$                   | 2.296                |
| <b>TDD-8</b> | <b>Triangular dodecahedron</b>             |             |                               | <b><math>D_{2d}</math></b> | <b>1.841</b>         |
| JGBF-8       | Johnson gyrobifastigium J26                |             |                               | $D_{2d}$                   | 15.391               |
| JETBPY-8     | Johnson elongated triangular bipyramid J14 |             |                               | $D_{3h}$                   | 24.197               |
| JBTPR-8      | Biaugmented trigonal prism J50             |             |                               | $C_{2v}$                   | 3.325                |
| BTPR-8       | Biaugmented trigonal prism                 |             |                               | $C_{2v}$                   | 3.111                |
| JSD-8        | Snub diphenoid J84                         |             |                               | $D_{2d}$                   | 3.976                |
| TT-8         | Triakis tetrahedron                        |             |                               | $T_d$                      | 10.588               |
| ETBPY-8      | Elongated trigonal bipyramid               |             |                               | $D_{3h}$                   | 21.086               |
| <b>2</b>     | Zn <sup>II</sup>                           |             |                               | HP-6                       | Hexagon              |
|              |                                            | PPY-6       | Pentagonal pyramid            | $C_{5v}$                   | 20.122               |
|              |                                            | <b>OC-6</b> | <b>Octahedron</b>             | <b><math>O_h</math></b>    | <b>4.184</b>         |
|              |                                            | TPR-6       | Trigonal prism                | $D_{3h}$                   | 11.144               |
|              |                                            | JPPY-6      | Johnson pentagonal pyramid J2 | $C_{5v}$                   | 24.202               |
|              |                                            | <b>2</b>    | Tb <sup>III</sup>             | OP-8                       | Octagon              |
| HPY-8        | Heptagonal pyramid                         |             |                               | $C_{7v}$                   | 23.270               |
| HBPY-8       | Hexagonal bipyramid                        |             |                               | $D_{6h}$                   | 15.570               |
| CU-8         | Cube                                       |             |                               | $O_h$                      | 10.166               |
| SAPR-8       | Square antiprism                           |             |                               | $D_{4d}$                   | 2.348                |
| <b>TDD-8</b> | <b>Triangular dodecahedron</b>             |             |                               | <b><math>D_{2d}</math></b> | <b>1.893</b>         |
| JGBF-8       | Johnson gyrobifastigium J26                |             |                               | $D_{2d}$                   | 15.420               |
| JETBPY-8     | Johnson elongated triangular bipyramid J14 |             |                               | $D_{3h}$                   | 24.260               |
| JBTPR-8      | Biaugmented trigonal prism J50             |             |                               | $C_{2v}$                   | 3.393                |
| BTPR-8       | Biaugmented trigonal prism                 |             |                               | $C_{2v}$                   | 3.172                |
| JSD-8        | Snub diphenoid J84                         |             |                               | $D_{2d}$                   | 4.049                |
| TT-8         | Triakis tetrahedron                        |             |                               | $T_d$                      | 10.687               |
| ETBPY-8      | Elongated trigonal bipyramid               |             |                               | $D_{3h}$                   | 21.187               |

**Table S4.** The fitting parameters  $\alpha$  and  $\tau$  values of **1** by using CC-FIT software.

| T     | $\alpha_1$ | $\tau_1$  | $\alpha_2$ | $\tau_2$ |
|-------|------------|-----------|------------|----------|
| 2.0 K | 0.3281     | 0.01555   | 0.6345     | 0.4116   |
| 2.4 K | 0.3605     | 0.004125  | 0.02030    | 0.1449   |
| 2.8 K | 0.2668     | 0.0006348 | 0.5077     | 0.09546  |
| 3.2 K | 0.2428     | 0.0001297 | 0.5658     | 0.03055  |

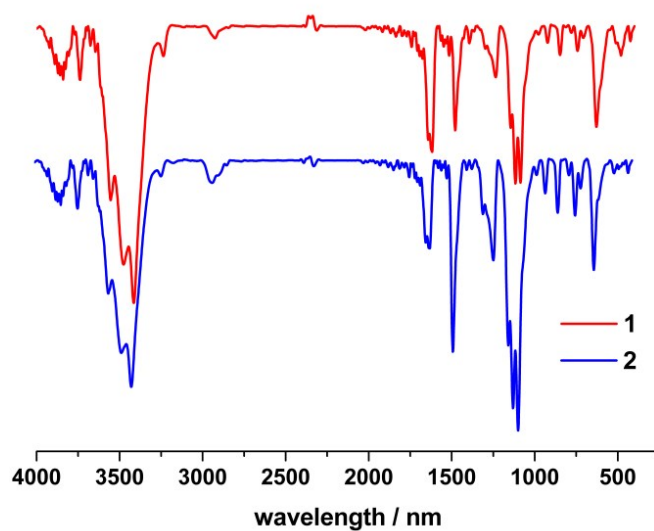

**Fig.S1.** The IR spectra of complexes **1** and **2**.

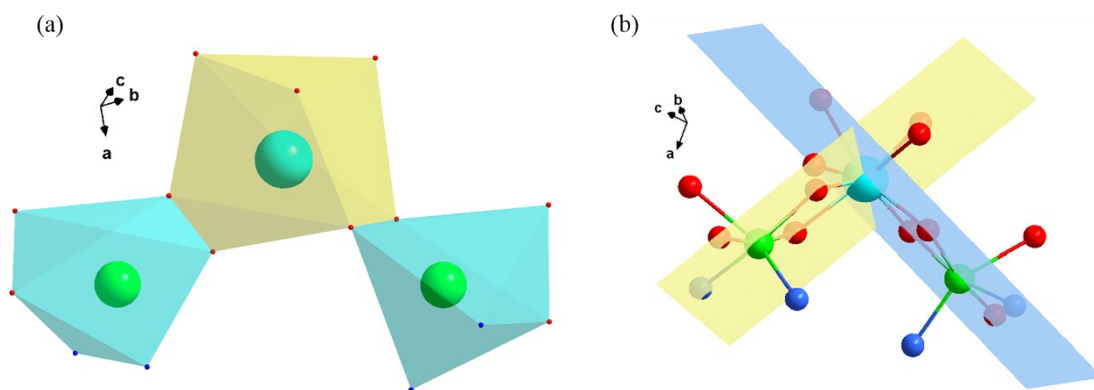

**Fig.S2.** The coordination polyhedron around  $Zn^{II}$  and  $Ln^{III}$  (a) and the dihedral angle (b).

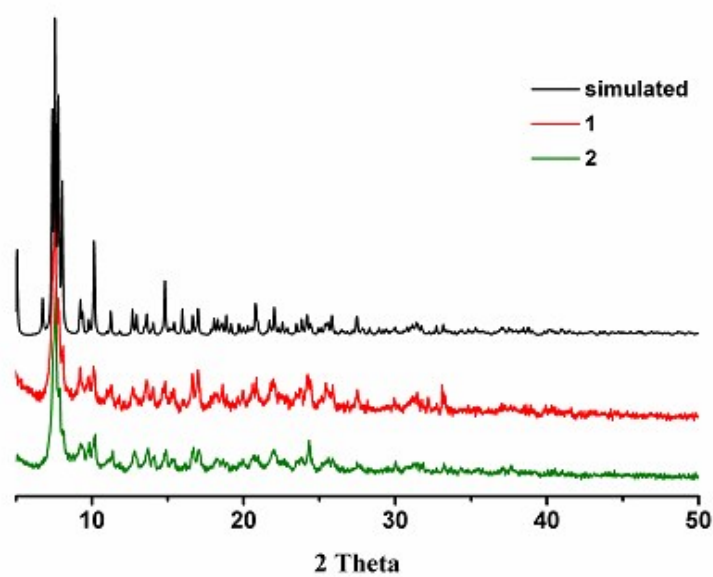

**Fig. S3.** The PXRD patterns of complexes 1 and 2.

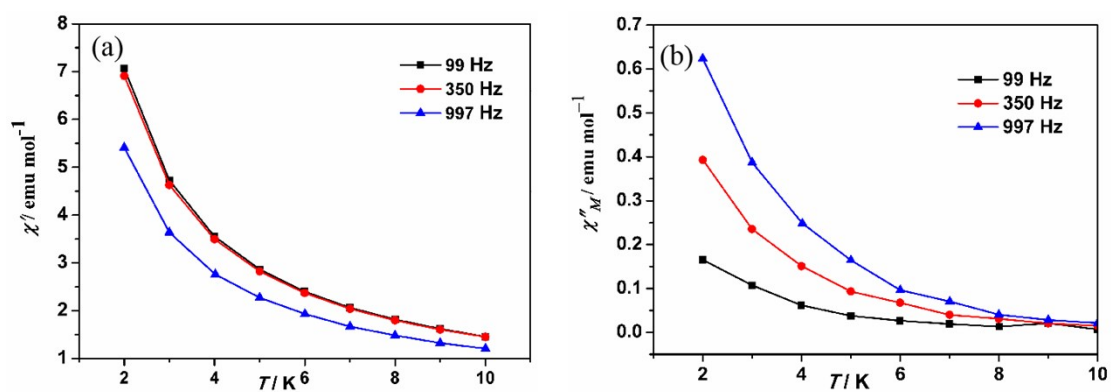

**Fig. S4.** Frequency dependence of the in-phase ( $\chi'$ ) and out-of-phase ( $\chi''$ ) ac susceptibility signals for 1 under zero-dc field.

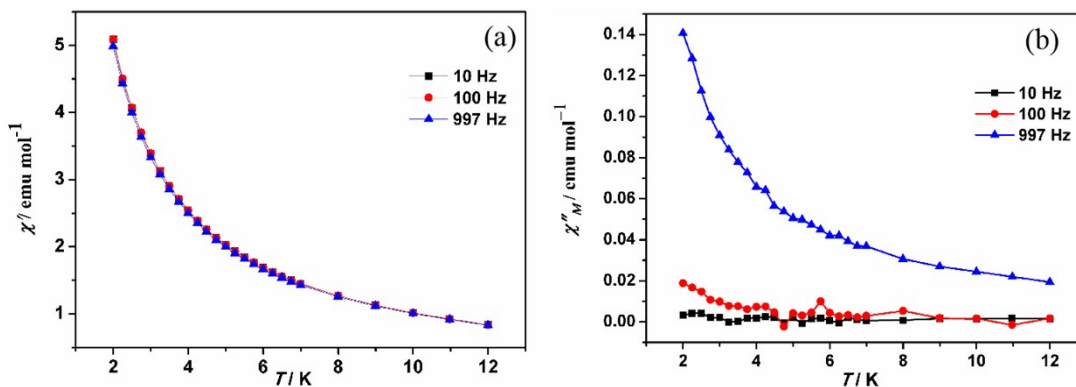

**Fig. S5.** Frequency dependence of the in-phase ( $\chi'$ ) and out-of-phase ( $\chi''$ ) ac susceptibility signals for **2** under zero-dc field.

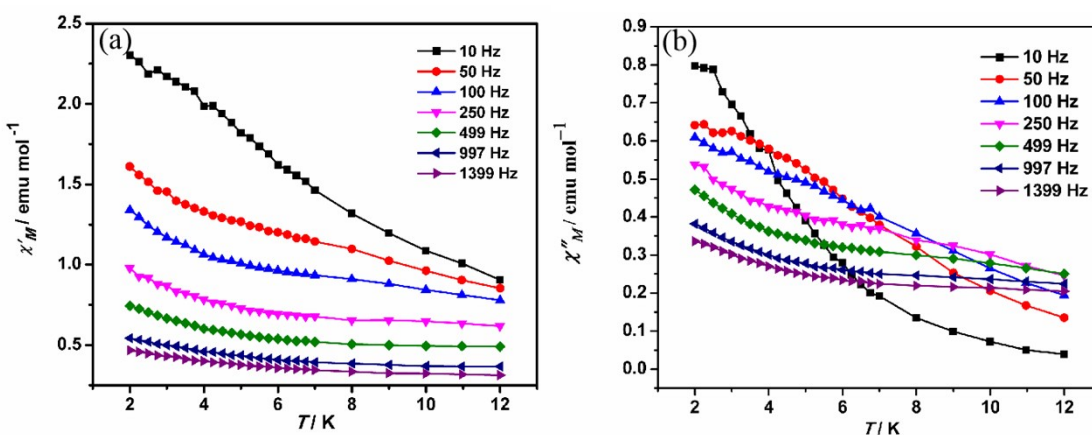

**Fig. S6.** Frequency dependence of the in-phase ( $\chi'$ ) and out-of-phase ( $\chi''$ ) ac susceptibility signals for **2** under 2000 Oe field.

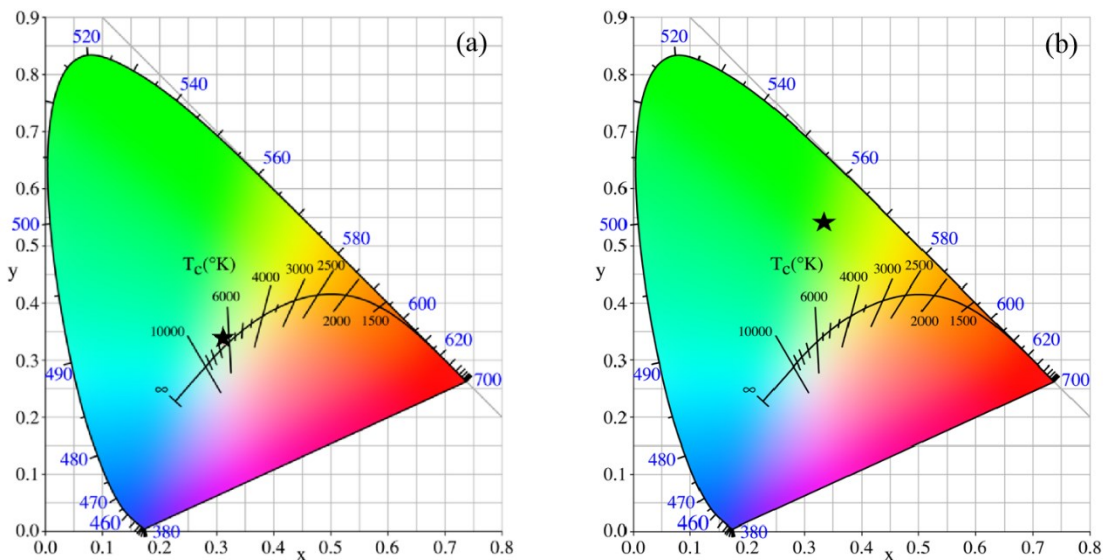

**Fig. S7.** CIE chromaticity diagram for the emission spectra of complex **1** under excitation 295 nm (a) and complex **2** under excitation 294 nm (b).



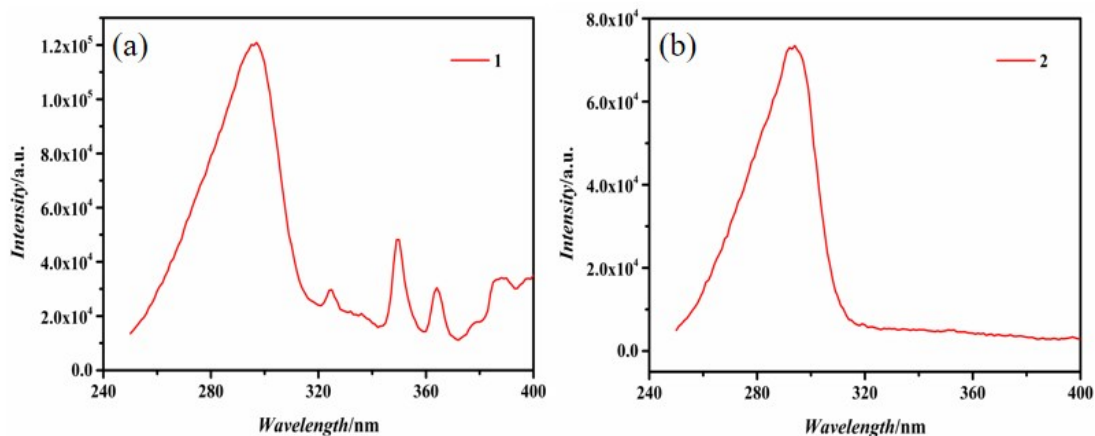

**Fig. S8.** (a) The fluorescent excitation spectra ( $\lambda_{em} = 572$  nm) of **1**; (b) The fluorescent excitation spectra ( $\lambda_{em} = 547$  nm) of **2**.

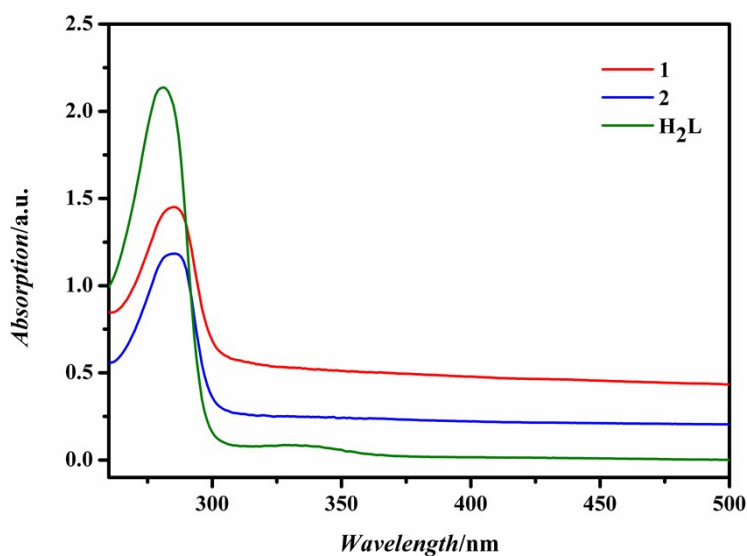

**Fig. S9.** The UV-Vis absorption spectra of **1**, **2** and H<sub>2</sub>L.

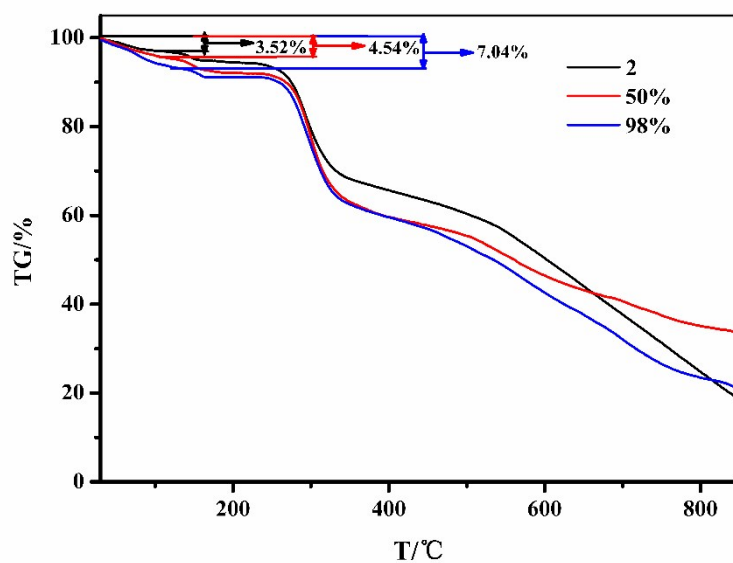

**Fig. S10.** The TG curves of **2** with the fresh sample and **2** stored at 50% and 98% RH conditions for 1 h.

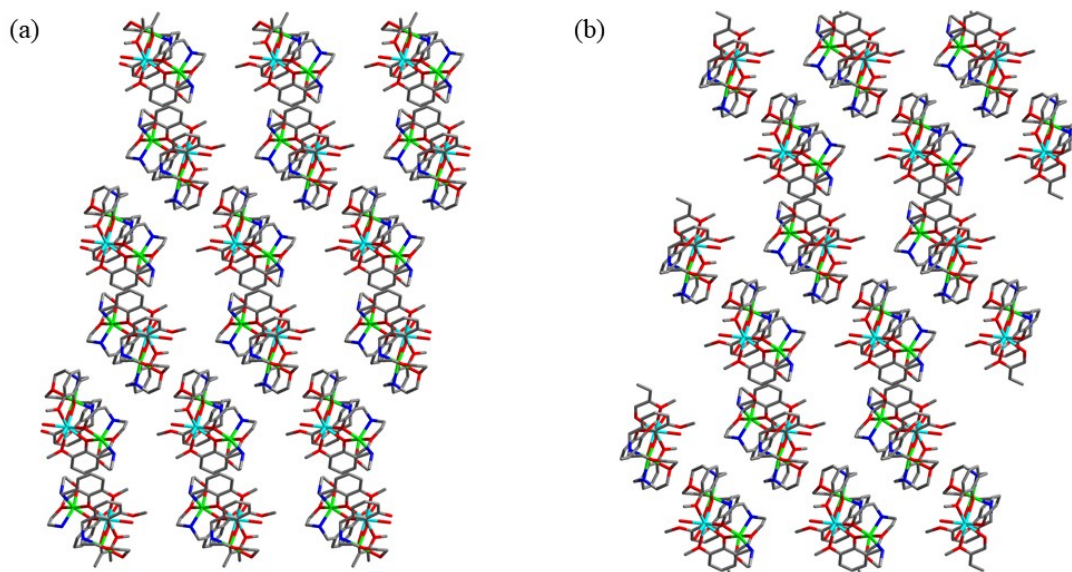

**Fig. S11.** The three-dimensional packing structures of **1** (a) and **2** (b).
